# Supplementary material for: A Continuous-Wave EPR Investigation into the Photochemical Transformations of the Chromium(I) Carbonyl Complex [Cr(CO)4bis(diphenylphosphino)]+ and Reactivity with 1-hexene
Source: MDPI journal article supplement (doi:10.3390/molecules29020392), 2024-01-12
Supplement: s1 [file s1]

# A Continuous-Wave EPR Investigation into the Photochemical Transformations of the Chromium(I) Carbonyl Complex $[\text{Cr}(\text{CO})_4\text{bis}(\text{diphenylphosphino})]^+$ and Reactivity with 1-hexene

David Fioco <sup>1,2,\*</sup>, Andrea Folli <sup>1</sup>, James Platts <sup>1</sup>, Mario Chiesa <sup>2</sup> and Damien M. Murphy <sup>1,\*</sup>

<sup>1</sup> School of Chemistry, Cardiff University, Main Building, Park Place, Cardiff CF10 3AT, UK; folli@cardiff.ac.uk (A.F.); platts@cardiff.ac.uk (J.P.)

<sup>2</sup> Dipartimento di Chimica e NIS Centre, Università degli Studi di Torino, via P. Giuria 7, 10125 Turin, Italy; mario.chiesa@unito.it

\* Correspondence: fiocod@cardiff.ac.uk (D.F.); murphydm@cardiff.ac.uk (D.M.M.)

## Supporting Information

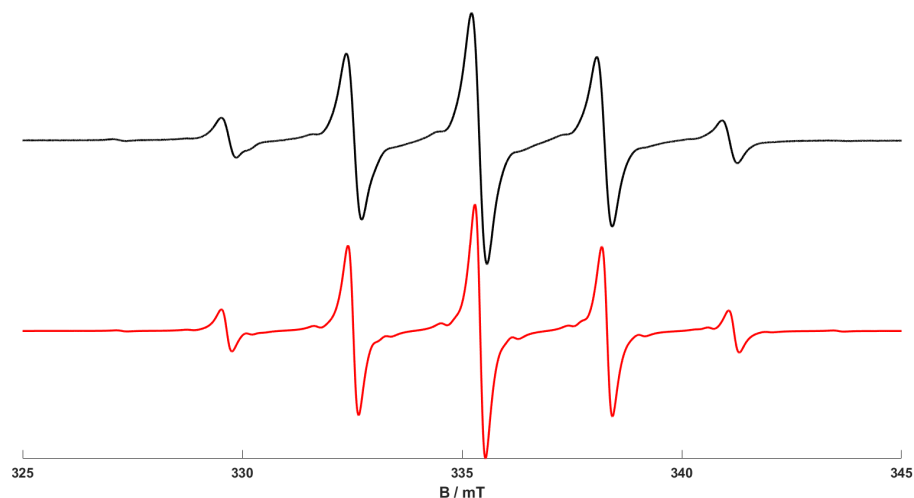

**Figure S1.** CW X-band EPR spectrum of the *trans*-[Cr(CO)<sub>2</sub>(dppp)<sub>2</sub>]<sup>+</sup> complex (**3**) recorded at 293 K (using 1 mM of (**1**) dissolved in dichloromethane) following 365 nm radiation at room temperature.

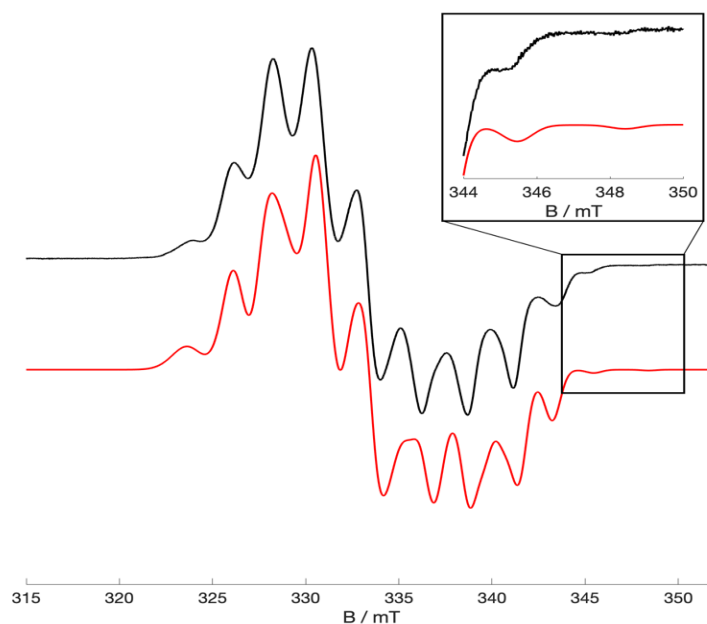

**Figure S2.** CW X band EPR spectrum (recorded at 140 K) obtained following room temperature UV irradiation (at 380 nm) of [Cr(CO)<sub>4</sub>(dppp)]<sup>+</sup> (**1**) (using 1 mM of (**1**) dissolved in DCM). The simulated spectrum (shown in red) was obtained using weighted contributions of [Cr(CO)<sub>4</sub>(dppp)]<sup>+</sup> (11%), *mer*-[Cr(CO)<sub>3</sub>(κ<sup>1</sup>-dppp) (κ<sup>2</sup>-dppp)]<sup>+</sup> (86%) and *trans*-[Cr(CO)<sub>2</sub>(dppp)<sub>2</sub>]<sup>+</sup> (3%). This experiment is analogous to the result presented in Figure 2 (main

paper), except in that case the 'photochemical yield' of (2) was 100%, and in this case the yield was only 86%; this highlights the slight variability in the photochemical transformation at this wavelength.

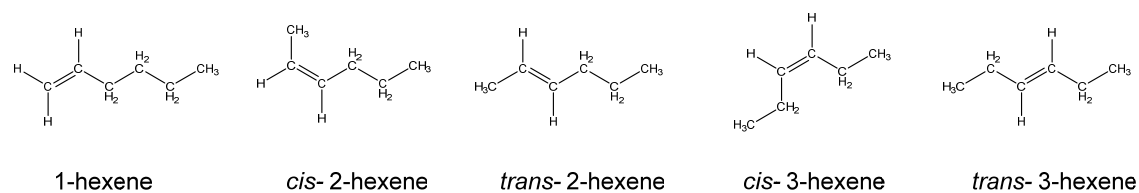

**Figure S3.** Schematic showing the different isomers of hexene studied here.
